# Supplementary material
Source: PubMed Central journal article supplement (PMC4362813)
Supplement: NIHMS623448-supplement-supplement_1.pdf [file NIHMS623448-supplement-supplement_1.pdf]

|               |                                                                                                                                                                                                                                                                                                                                                                                                                                                                                                                                                                                                                                                                                                                                                                                                                                                                                                                                                                                                          |
|---------------|----------------------------------------------------------------------------------------------------------------------------------------------------------------------------------------------------------------------------------------------------------------------------------------------------------------------------------------------------------------------------------------------------------------------------------------------------------------------------------------------------------------------------------------------------------------------------------------------------------------------------------------------------------------------------------------------------------------------------------------------------------------------------------------------------------------------------------------------------------------------------------------------------------------------------------------------------------------------------------------------------------|
| mse-miR-9571b | 2-deoxyglucose-6-phosphate phosphatase, ACBP, adrenodoxin, Bombyrin precursor, B. mori glutathione-S-transferase 4, B. mori glutathione-S-transferase 5, calcium-binding protein p22, carbonyl reductase, chitin binding domain 3 protein, copper transporter, fatty acid binding protein, glutathione S-transferase 13, His-triad nucleotide binding protein 3, hydroxybutyrate dehydrogenase (m.24658), isocitrate dehydrogenase (m.30761), kynureninase, MCT (m.94739), mitochondrial carrier like, MSBP, Pap-inositol-1,4-phosphatase, peripheral-type benzodiazepine receptor, $\alpha$ -1,3-fucosyltransferase, bhlhzip TF bigmax, lysosomal acid lipase, RAB6-interacting golgin like, vacuolar ATP synthase subunit S1, pyroglutamyl peptidase 1, Ras family protein, SCP related protein, serine protease (m.46246), short chain type dehydrogenase (m.81137), sugar transporter SWEET1, synaptic vesicle glycoprotein 2B, synaptobrevin, transporter (m.78218), v-type proton ATPase subunit F |
| mse-miR-9a*   | chitin binding domain 3 protein, citrate synthase, cytochrome P450 4M1, ecdysoneless, glucose dehydrogenase, HoxX, lactoylglutathione lyase, LRR, metal transporter CNNM2 like, methylmalonyl-CoA carboxyltransferase 12S subunit, organic cation transporter (m.57266), peroxisomal biogenesis factor 19, harmonin, SCP related protein                                                                                                                                                                                                                                                                                                                                                                                                                                                                                                                                                                                                                                                                 |
| mse-miR-10a*  | glutathione S-transferase 13, HoxX22, methylcrotonoyl-CoA carboxylase 1 $\alpha$ , NADPH cytochrome P450 reductase, dipeptidyl peptidase, SSR $\beta$ subunit                                                                                                                                                                                                                                                                                                                                                                                                                                                                                                                                                                                                                                                                                                                                                                                                                                            |
| mse-miR-281*  | cytochrome c-like, isochorismatase domain containing protein, phosphoenolpyruvate synthase, bhlhzip TF bigmax                                                                                                                                                                                                                                                                                                                                                                                                                                                                                                                                                                                                                                                                                                                                                                                                                                                                                            |
| mse-miR-283*  | 3-dehydroecdysone-3 $\alpha$ reductase, eIF2A, O-acyltransferase, peroxisomal biogenesis factor 19, prenyl-dependent CAAAX metalloprotease, bhlhzip TF bigmax, pyridoxal-phosphate dependent enzyme                                                                                                                                                                                                                                                                                                                                                                                                                                                                                                                                                                                                                                                                                                                                                                                                      |
| mse-miR-316*  | acetoacetyl-CoA thiolase, ARF, B. mori glutathione-S-transferase 4, cytochrome P450 6AE32, fatty acid binding protein, glutathione S-transferase 13, HoxX, innexin, isovaleryl CoA dehydrogenase, metal transporter CNNM2 like, ADK 3, regucalcin, retinol dehydrogenase, short chain type dehydrogenase (m.29729), v-type proton ATPase subunit C                                                                                                                                                                                                                                                                                                                                                                                                                                                                                                                                                                                                                                                       |
| mse-miR-750*  | dimeric dihydrodiol dehydrogenase, lactoylglutathione lyase, methylcrotonoyl-CoA carboxylase 1 $\alpha$ , NADPH cytochrome P450 reductase                                                                                                                                                                                                                                                                                                                                                                                                                                                                                                                                                                                                                                                                                                                                                                                                                                                                |

\*If gene names are the same, the transcript IDs (m. number) were included in the parentheses.

**Table 7.** Potential regulatory pairs of miRNAs and mitochondrial genes

| Gene                                                      | miRNA                |
|-----------------------------------------------------------|----------------------|
| mitochondrial ornithine transporter                       | mse-miR-100          |
| mitochondrial carrier protein                             | mse-miR-8, t4742895* |
| mitochondrial solute carrier                              | mse-miR-279c         |
| tricarboxylate transport protein                          | mse-miR-10a*         |
| adrenodoxin                                               | mse-miR-9571a, 9571b |
| mitochondrial cytochrome C oxidase subunit 6A             | mse-miR-316          |
| mitochondrial NADPH adrenodoxin oxidoreductase            | mse-miR-9571a        |
| mitochondrial succinate semialdehyde dehydrogenase        | mse-miR-1, 277       |
| mitochondrial short-chain specific acyl CoA dehydrogenase | mse-miR-137, 9571a   |
| SCOT                                                      | mse-miR-277          |
| mitochondrial carrier like                                | mse-miR-9571a, 9571b |

**Table S1.** A list of 26 novel miRNA candidates\*

| name      | candidate mature sequence | fat body | hemocytes | midgut | Predicted precursor |        |         |         |        |
|-----------|---------------------------|----------|-----------|--------|---------------------|--------|---------|---------|--------|
|           |                           |          |           |        | Scaffold            | Strand | Start   | End     | MFE    |
| t41312    | AAAAUUCUUAACCAGGCGAG      | 5        | 113       | 2      | 35                  | minus  | 1397534 | 1397635 | -37.2  |
| t1349963  | AUCAGAUUUGUGGCAACUCG      | 2        | 11        | 2      | 45                  | minus  | 1412730 | 1412832 | -33.6  |
| t1410244  | AUCGUUCGUUCACACCUGAUG     | 56       | 18        | 54     | 945                 | plus   | 52822   | 52922   | -20.77 |
| t1578118  | AUUACUAGUAAUUCUGAAGCUUC   | 14       | 0         | 2      | 389                 | plus   | 62033   | 62135   | -39.69 |
| t1743832  | CAAUUGGGAAUUCUUGCAAGC     | 5        | 0         | 27     | 64                  | minus  | 103034  | 103132  | -22.5  |
| t1766011  | CAACUUCGUUUUGGACAGAGC     | 8        | 0         | 10     | 755                 | minus  | 56820   | 56922   | -29.1  |
| t3046669  | GACAAACAGUGACUAGUUAGAAAC  | 24       | 0         | 20     | 48                  | plus   | 517657  | 517760  | -28.5  |
| t3125494a | GACUUUUUGUAAUUGUAAUUUUUG  | 295      | 185       | 68     | 770                 | minus  | 68976   | 69079   | -25.12 |
| t3125494b | GACUUUUUGUAAUUGUAAUUUUUG  | 295      | 185       | 68     | 282                 | plus   | 446264  | 446367  | -27.4  |
| t3334552  | GAUUUGUACGUUUUGCGCAGGC    | 4        | 0         | 14     | 741                 | minus  | 71483   | 71583   | -31.9  |
| t3857561  | GUACGUGUUGUGACCUUGAUUA    | 5        | 0         | 6      | 18                  | minus  | 1109289 | 1109390 | -28.3  |
| t4065768  | GUGGACUUUGCUUGAACUGGAG    | 30       | 0         | 5      | 22                  | plus   | 893289  | 893393  | -30.8  |
| t4085867  | GUGGGGCAAAUUGCGAAAGCUG    | 3        | 1         | 10     | 62                  | plus   | 910038  | 910139  | -53.3  |
| t4142920  | GUUUGUUGGAGAUGGACGCG      | 24       | 0         | 25     | 2                   | minus  | 2944506 | 2944608 | -21    |
| t4181099  | GUUGAAGAUUCGCAUCGACGGC    | 12       | 0         | 9      | 132                 | minus  | 70953   | 71054   | -36.01 |
| t4247673  | GUUUUGUUUGUUGUAAAGAAGGC   | 9        | 0         | 4      | 68                  | plus   | 42495   | 42596   | -27.9  |
| t4330184  | UAGAAGUUUGGUAUGACAUCAC    | 0        | 0         | 12     | 268                 | plus   | 99888   | 99989   | -45.2  |
| t4639756  | UAUAAUAAACAGCACUGUACU     | 8        | 6         | 6      | 216                 | plus   | 414243  | 414343  | -36.62 |
| t4780013  | UAUUUGCGUUGUUUUUGCAG      | 73       | 492       | 38     | 6                   | minus  | 389208  | 389308  | -18.12 |
| t4973453  | UCCGGAAGUUGAAGUCUACUAG    | 5        | 17        | 1      | 42                  | minus  | 57500   | 57600   | -65.5  |
| t5794030  | UUAACGAUUGUAGAAAGGCAU     | 6        | 0         | 215    | 18                  | plus   | 1453068 | 1453169 | -39.5  |
| t5903013  | UUUUGGCGUUGGUUUAUUAU      | 2        | 0         | 27     | 513                 | plus   | 25548   | 25650   | -58.7  |
| t5986234  | UUCGAACCAACAUAGAUGUGCC    | 5        | 2         | 3      | 551                 | plus   | 138319  | 138420  | -52.2  |
| t6185971  | UUUGCGGGAGGACAUUGGCG      | 38       | 1         | 0      | 102                 | plus   | 247629  | 247731  | -28.4  |
| t6322016a | UUUGAAUUAAGGAAAACAGC      | 7        | 17        | 6      | 352                 | plus   | 301079  | 301178  | -54.2  |
| t6322016b | UUUGAAUUAAGGAAAACAGC      | 7        | 17        | 6      | 352                 | minus  | 301078  | 301177  | -51.3  |

\* Read numbers are absolute values from each library. The unit of precursor MFE is kcal/mol.

**Table S2.** Abundances of conserved miRNAs with no precursors identified\*

| name         | mature miRNA sequence      | fat body | hemocytes | midgut |
|--------------|----------------------------|----------|-----------|--------|
| miR-1        | UGGAAUGUAAAGAAGUAUGUAG     | 927      | 15        | 1468   |
| miR-1        | UGGAAUGUAAAGAAGUAUGUAGU    | 841      | 15        | 1451   |
| miR-1        | UGGAAUGUAAAGAAGUAUGUGA     | 833      | 15        | 1447   |
| miR-1        | UGGAAUGUAAAGAAGUAUGCGU     | 832      | 15        | 1445   |
| miR-2        | UAUCACAGCCAGCUUUGAUGAGU    | 15       | 21        | 6      |
| miR-2        | UAUCACAGCCAGCUUUGAUGUGC    | 1        | 1         |        |
| miR-7        | UGGAAGACUAGUGAUUUUUAUGUU   |          | 1         |        |
| miR-8        | UAAUACUGUCAGGUAAUGAUGUC    | 5        |           |        |
| miR-8        | UAAUACUGUAGGUAAAGAUGCC     | 5        | 1         |        |
| miR-9        | UCUUUGGUUUUCUAGCUGUAGA     | 25       | 4         | 24     |
| miR-9        | UCUUUGGUUUACCUAGCUGUAUGA   | 2        |           | 1      |
| miR-13       | UAUCACAGCCAUUUUUGACGAGU    | 6        | 19        | 2      |
| miR-13       | UAUCACAGCCACUUUGAUGUG      | 1        | 3         |        |
| miR-31       | GGCAAGAAGUCGGCAUAGCUG      | 4        | 10        | 5      |
| miR-33       | GUGCAUUGUAGUUGCAUUGCAU     | 27       | 6         | 9      |
| miR-33       | GUGCAUUGUAGUUGCAUUGC       | 23       | 3         | 7      |
| miR-33       | GUGCAUUGUAGUUGCAUUG        | 2        |           |        |
| miR-34       | UGGCAGUGUGGUUAGCUGGUAGU    | 8        | 9         | 7      |
| miR-71       | UGAAAGACAUGGGUAGUGAGAUU    | 34       | 28        | 15     |
| miR-71       | UGAAAGACAUGGGUAGUGAGACG    | 26       | 16        | 13     |
| miR-79       | UAAAGCUAGAUUACCAAAGCAU     | 18       | 5         | 6      |
| miR-100      | AACCCGUAGAUCCGAACUUGUGU    | 20619    | 14576     | 8001   |
| miR-100      | GACCCGUAGAUCCGAACUUGUG     | 176      | 406       | 117    |
| miR-100      | AACCCGUAAAUCGAACUUGUG      | 1        | 1         |        |
| miR-184      | UGGACGGAGAACUGAUAAAGGGU    | 415146   | 2360658   | 243350 |
| miR-184      | UGGACGGAGAACUGAUAAAGGCU    | 205010   | 1273289   | 130574 |
| miR-184      | UGGACGGAGAACUGAUAAAGGA     | 840      | 1232      | 468    |
| miR-184      | UGGACGGAGAAUUGAUAAAGGGU    | 135      | 613       | 63     |
| miR-184      | UGGACGGAGAACUGAUAGGGC      | 40       | 231       | 18     |
| miR-252      | AUAAGUACUAGUGCCGCAGGAG     | 32       | 6         | 1      |
| miR-252      | CUAAGUACUAGUGCCGCAGGUGU    | 13       | 4         |        |
| miR-263      | AAUGGCACUGAAAGAAUUCACGGG   | 9        | 1         | 9      |
| miR-274      | GUUUGUGACCGUCACUAACGGGCAGU | 49320    | 7         | 7      |
| miR-276      | UAGGAACUUAUACCGUGCUCU      | 3        | 8         | 4      |
| miR-278      | UCGGUUGGAUUUUCGUCCGUUU     | 1        |           | 1      |
| miR-281      | ACUGUCAUGGAGUUGCUCUCUU     | 42       |           | 41     |
| miR-305      | AUUGUACUUAUCAGGUGCUCUGG    | 3292     | 2220      | 1426   |
| miR-305      | AUUGUACUUAUCAGGUGCUCU      | 75       | 49        | 23     |
| miR-305      | GGCGCUUGUUGGAGUACACUU      | 2        | 3         | 2      |
| miR-317      | UGAACACAGCUGGUGUAUAUCAGU   | 412      | 99        | 376    |
| miR-750      | AGUUGGACAGGGGAUCUUGACA     | 12       | 6         | 617    |
| miR-927      | UUUUAGAAUJCCUACGCUUUACC    | 2313     | 100       | 7      |
| miR-932      | UCAAUJCCGUAGUGCAUJGCAG     | 1        | 7         | 1      |
| miR-970      | UCAUAAGACACACGCGGCUAU      | 2        | 56        | 2      |
| miR-981      | UUCGUUGUCGACGAAACCUGCCU    |          |           | 1      |
| miR-989      | UGUGAUGUGACGUAGUGGAACA     | 2        | 1         | 1      |
| miR-1175     | UGAGAUUCAACUCCUCCAACUJGC   | 3        |           | 76     |
| miR-1175     | UGAGAUUCAACUCCUCCAACUJAA   | 19       | 8         | 1473   |
| miR-1175     | AAGUGGAGGUGUGAUCUUCUJCA    | 5        | 1         | 505    |
| miR-1959     | GGGGAUGUAGCUCAGUGGAG       | 391      | 32        | 174    |
| miR-2478     | GUAUCCACUUCUGACACCA        | 90       | 19        | 50     |
| miR-2795     | CAAGUUUGGUGAUACGCGGGCGC    | 60       | 146       | 23     |
| mse-bantam-b | UGAGAUCAUUGUGAAAGCUJAU     | 162      | 111       | 147    |
| mse-bantam-c | UGAGAUCAUUGUGAAAGCUJAUU    | 76       | 29        | 75     |
| mse-let-7b   | UGAGGUAGUAGGUUGUGUGGUU     | 49       | 7         | 23     |
| mse-let-7c   | UGAGGUAGUAGGUUGUJAUUGGUU   | 969      | 66        | 538    |
| mse-let-7e   | UGAGGUAGGAGGUUGUJAUJAGU    | 6        | 2         | 2      |
| mse-let-7f   | UGAGGUAGUUGGUUGUJAUJAGU    | 10       | 3         | 4      |
| mse-let-7g   | UGAGGUAGUAGUUUGUJAUJAGUU   | 17       | 9         | 6      |
| mse-let-7h   | UGAGGUAGGAGGUUGUJAUJAGUU   | 7        | 2         | 3      |
| mse-let-7i   | AGAGGUAGUAGGUUGCAUJAGUU    | 1        |           |        |
| mse-let-7j   | UGAGGUAGUAGGUUGUJAUJAGUU   | 11       | 4         | 4      |

\* Abundances are shown in normalized reads per million. Numbers are blank for those either non-detectable or with normalized values below 0.5.
